# Supplementary material
Source: PubMed Central journal article supplement (PMC4814347)

# Supplemental Fig 8

## Fig. 1d

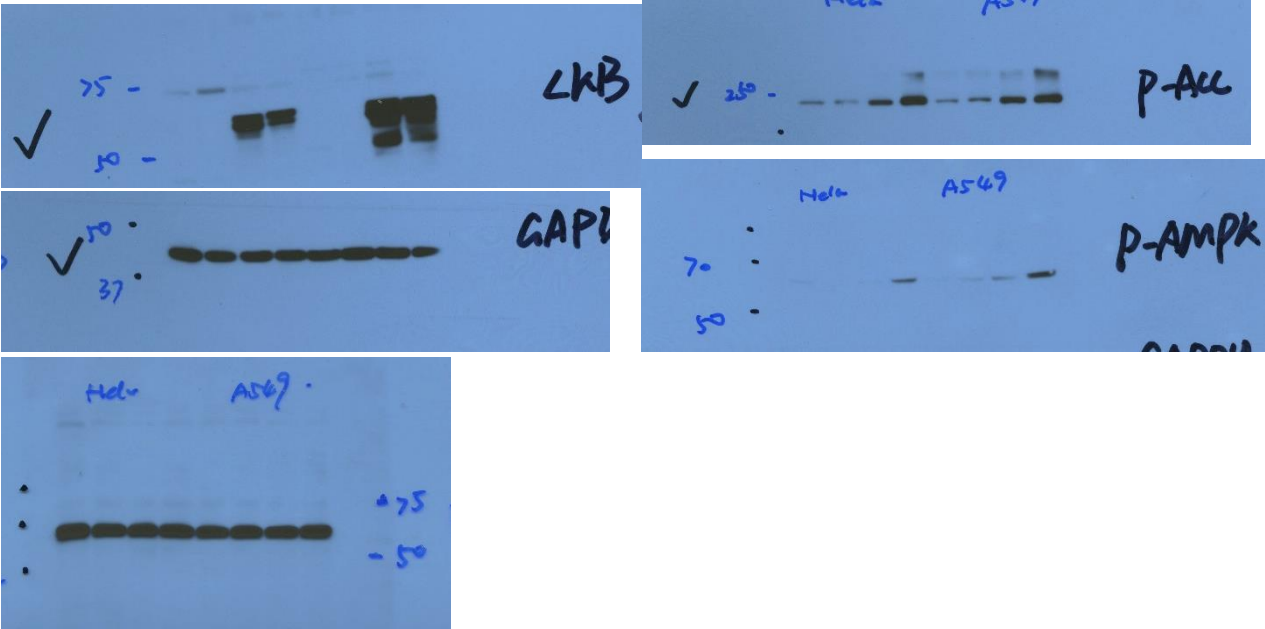

**Fig. 2 b**

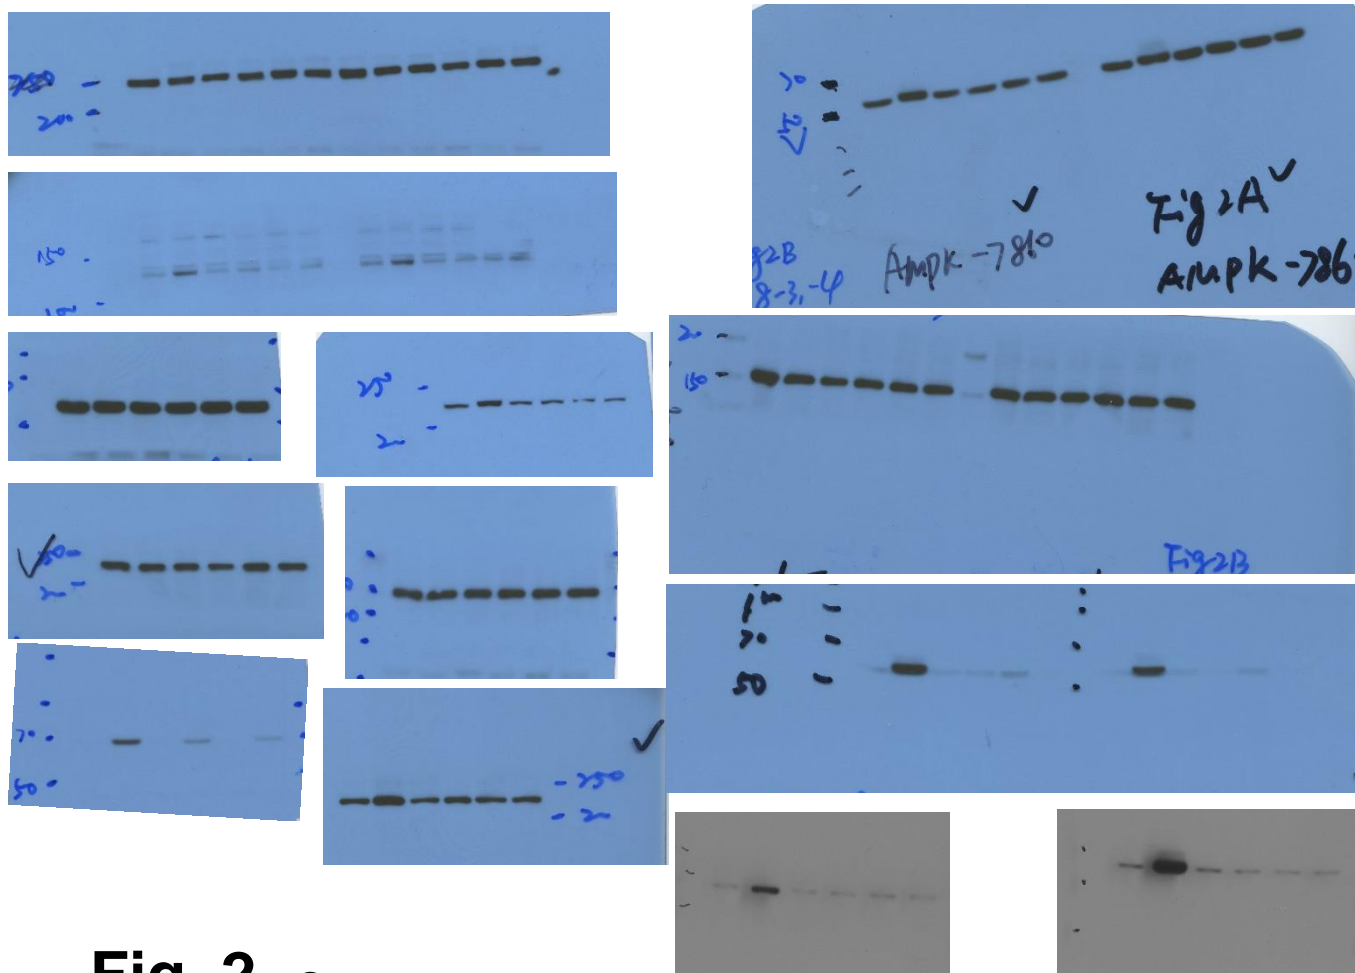

**Fig. 2 c**

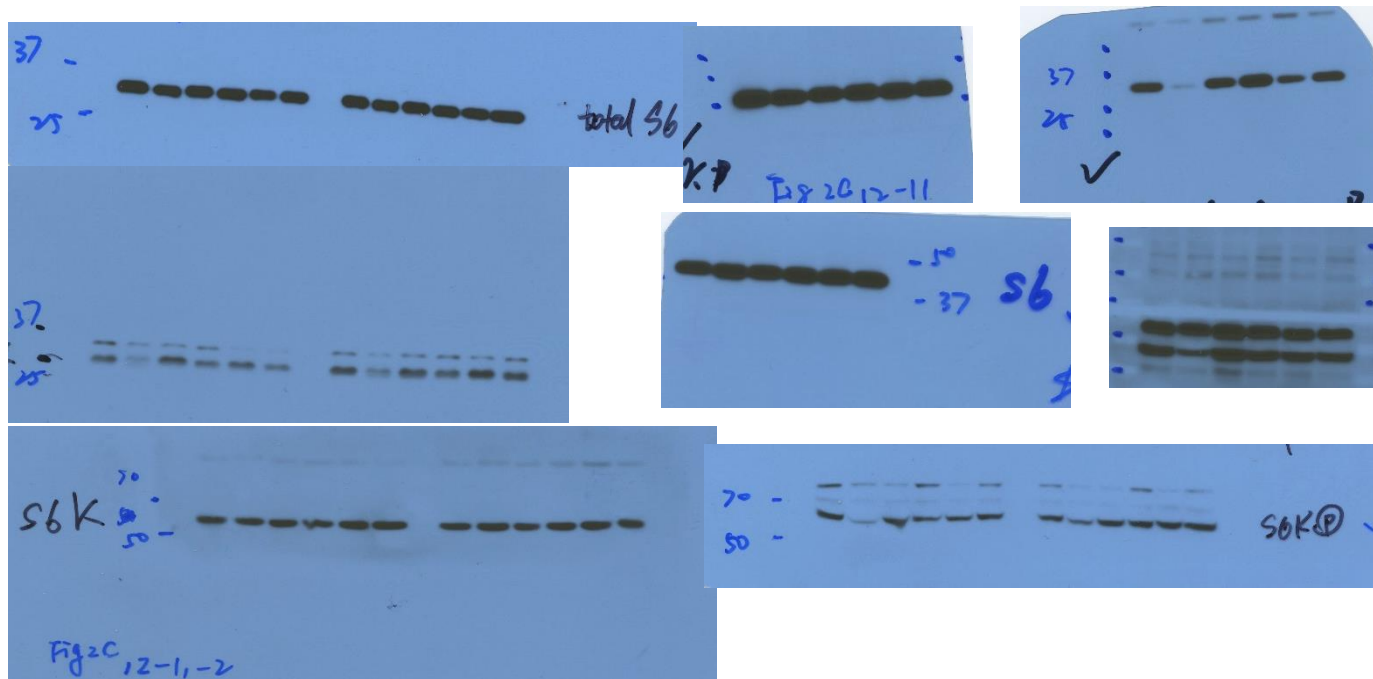

Fig. 2 d

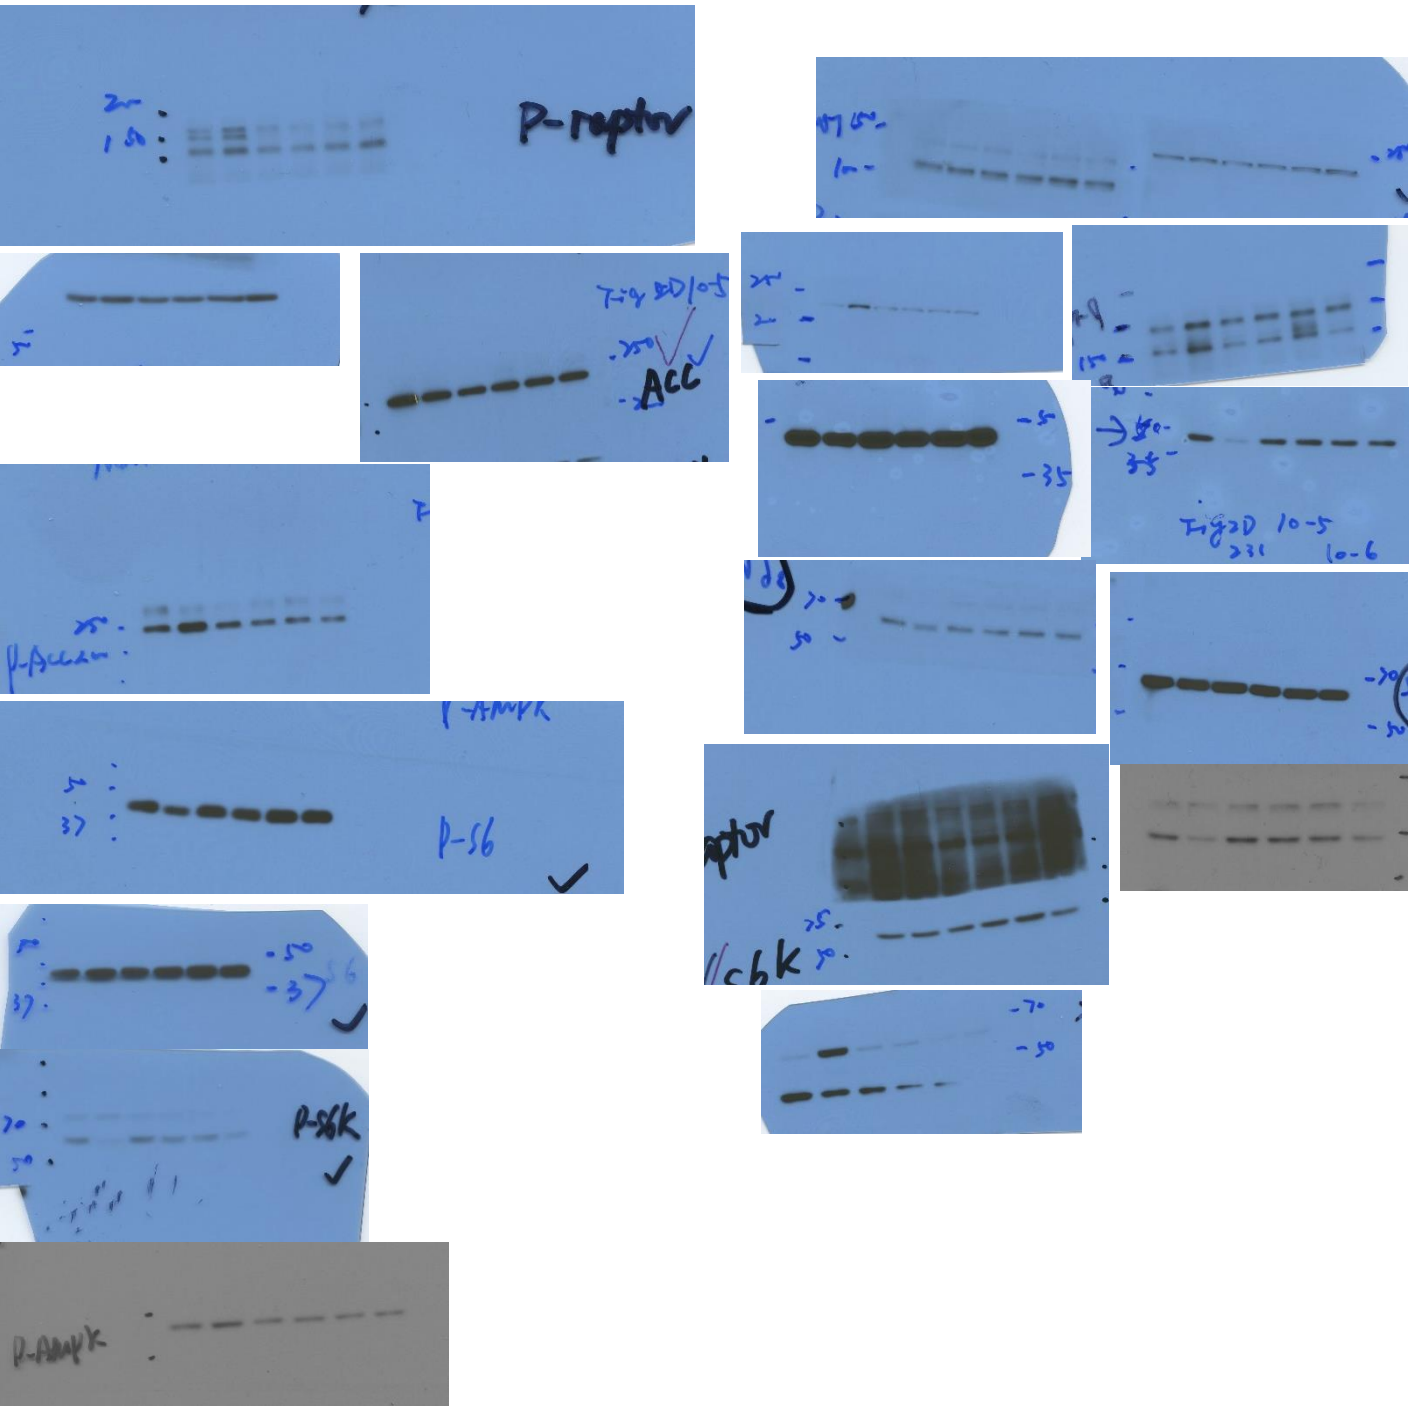

Fig. 2 e

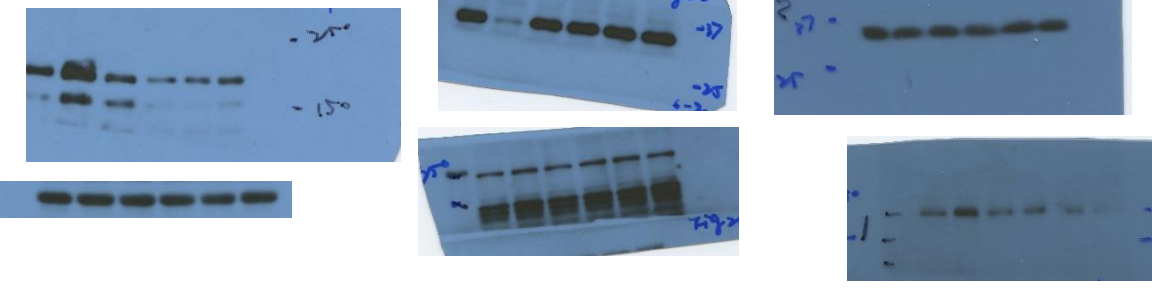

**Fig. 3f**

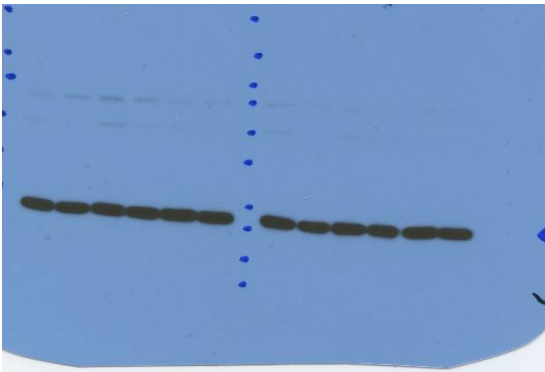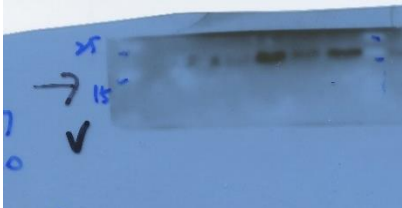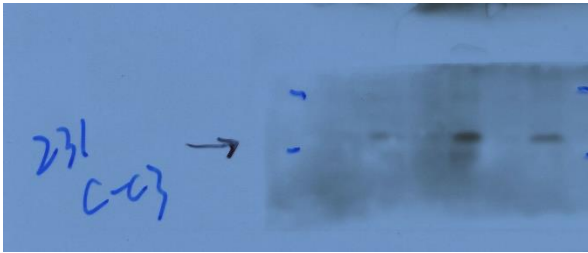

**Fig. 4d**

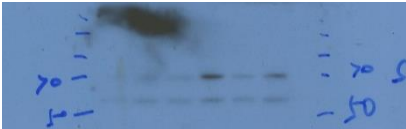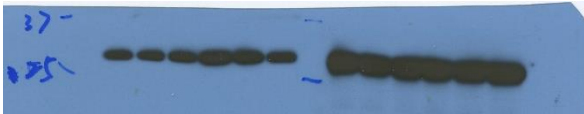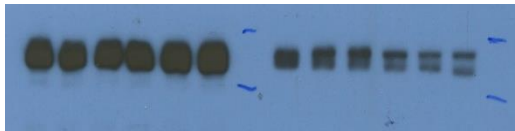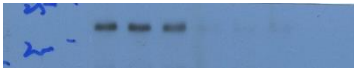

# Fig. 5

**b**

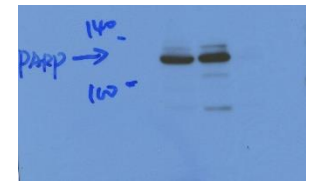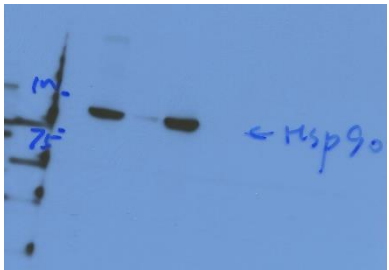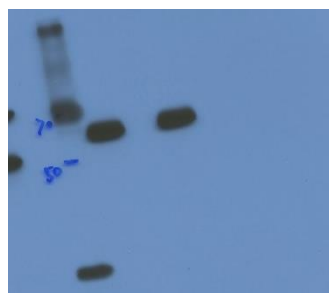

**d**

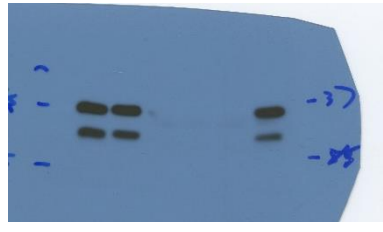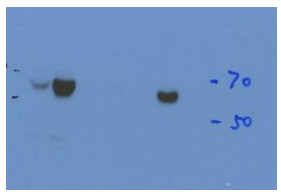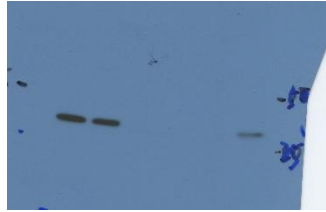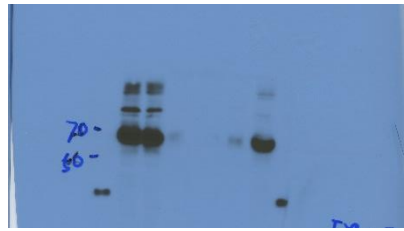

**c**

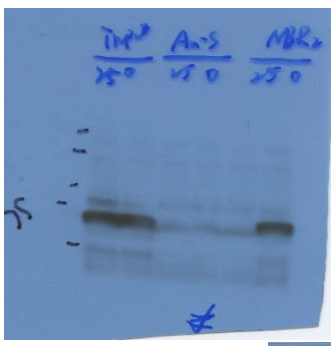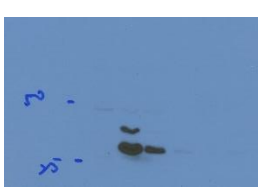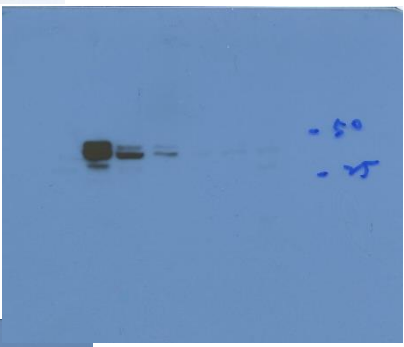

**e**

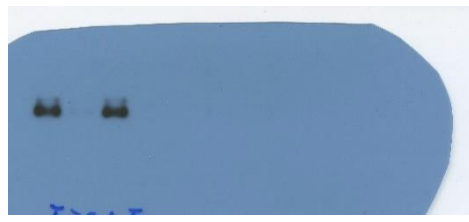

**f**

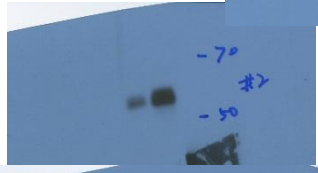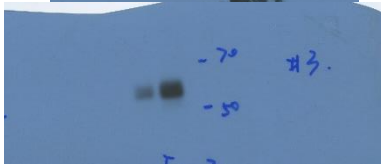

**H**

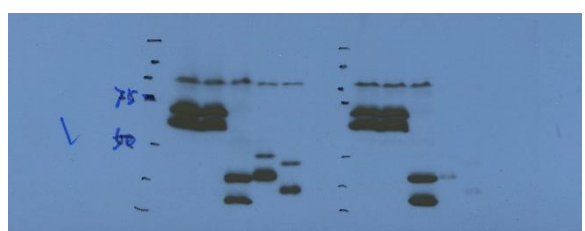

# Fig. 6

a

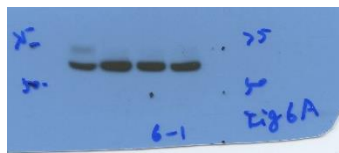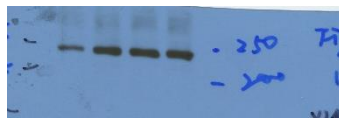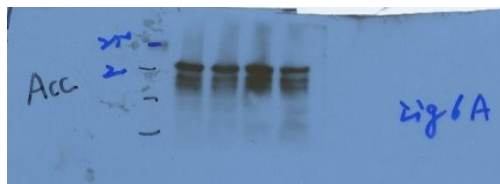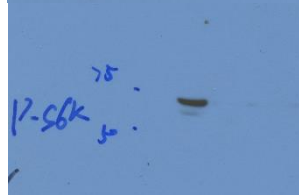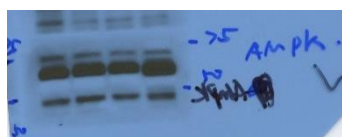

b

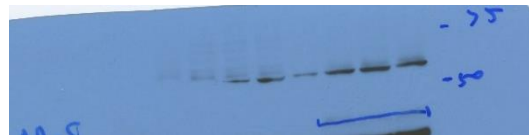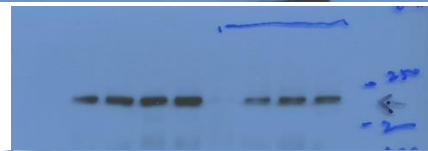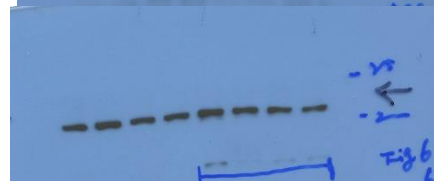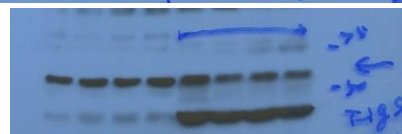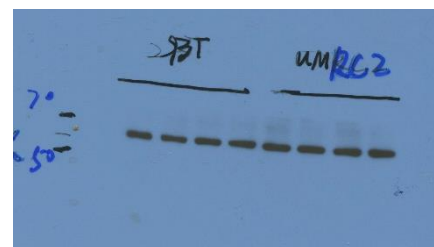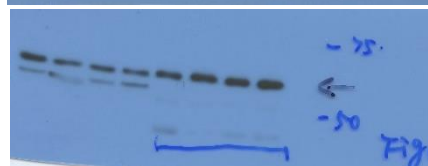

d

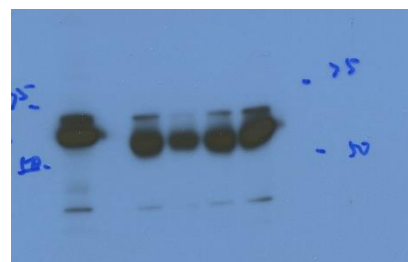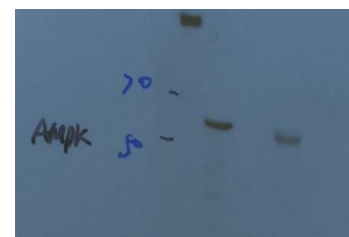

g

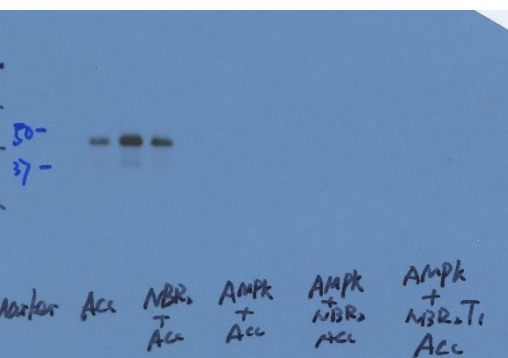

e

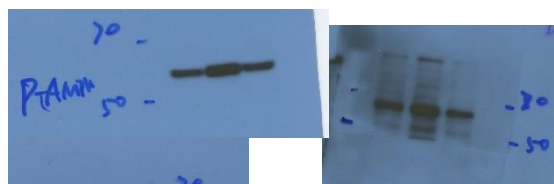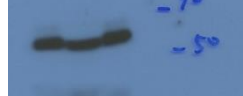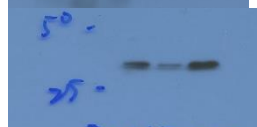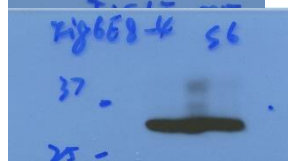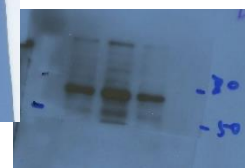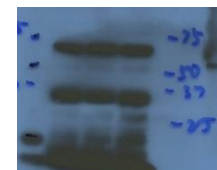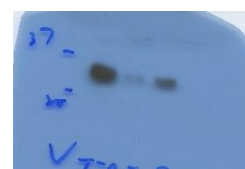

# Fig. 7

a

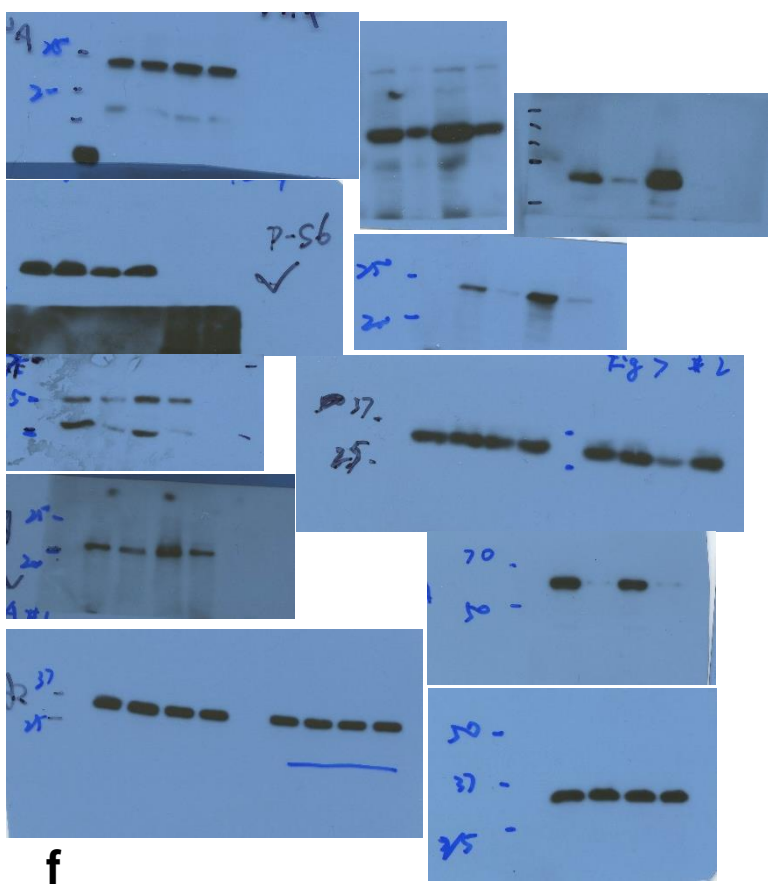

c

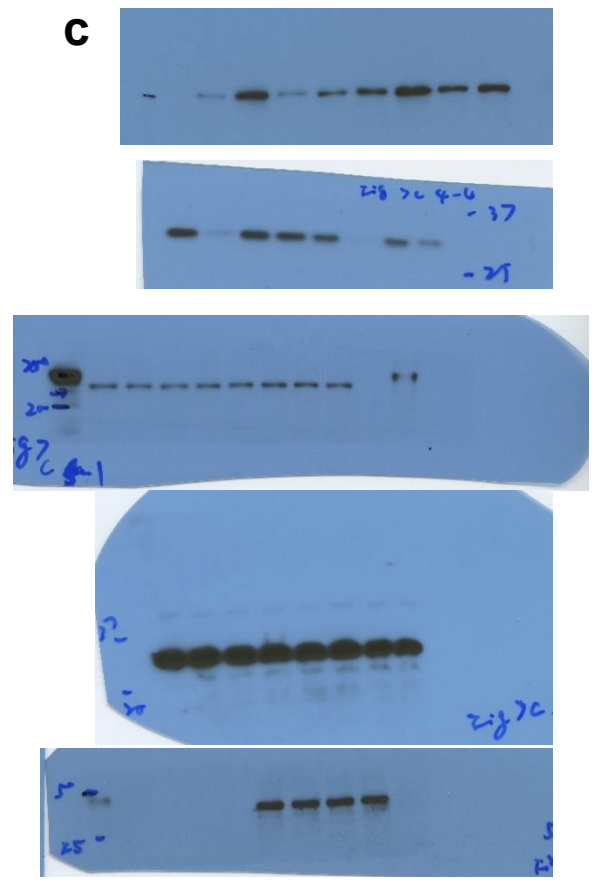

f

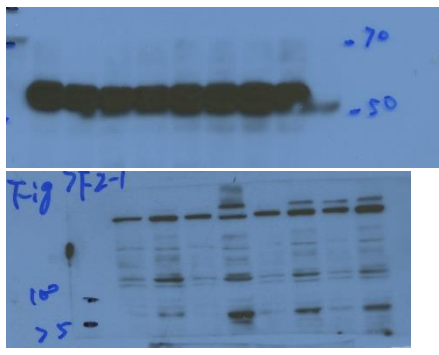

# Fig. S2

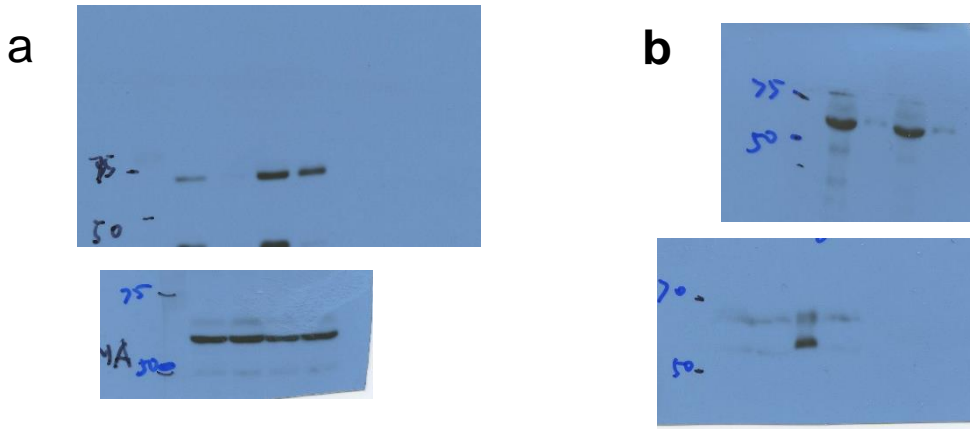

# Fig. S3 b

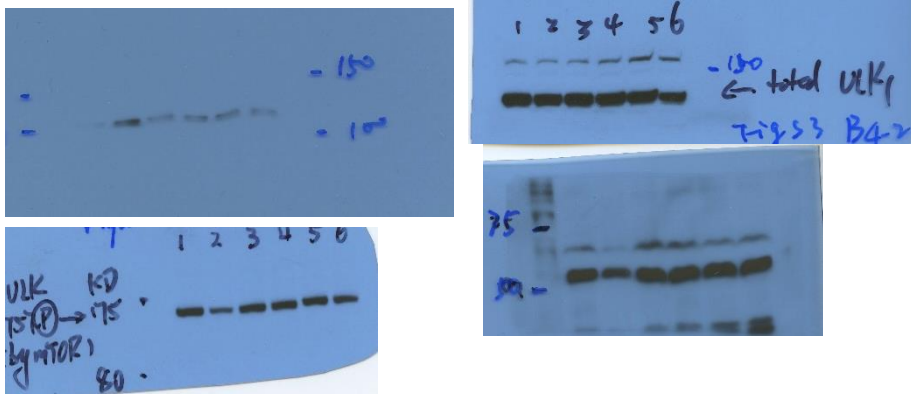



**Fig. S4**

**a**

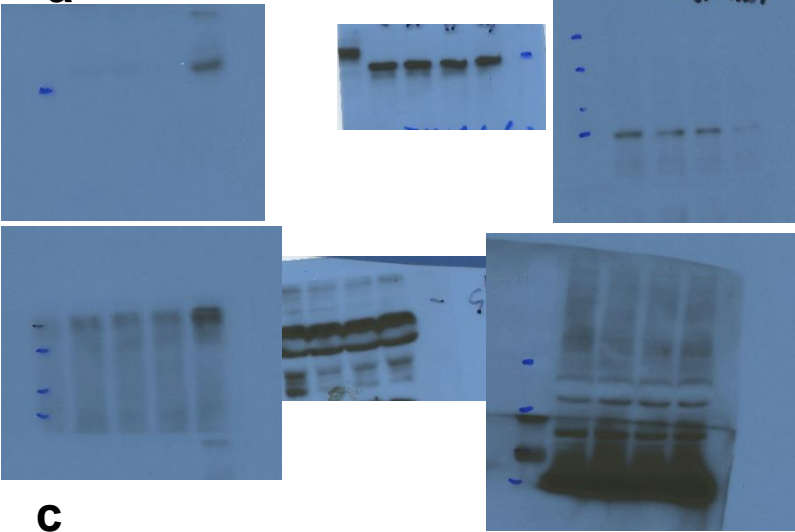

**b**

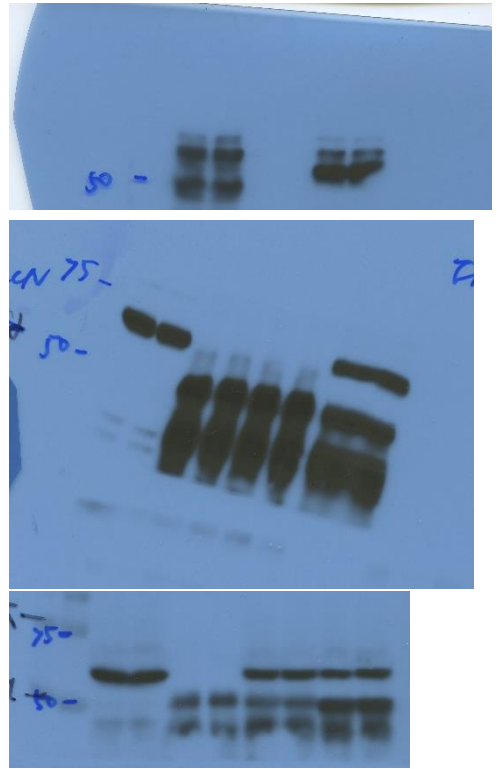

**c**

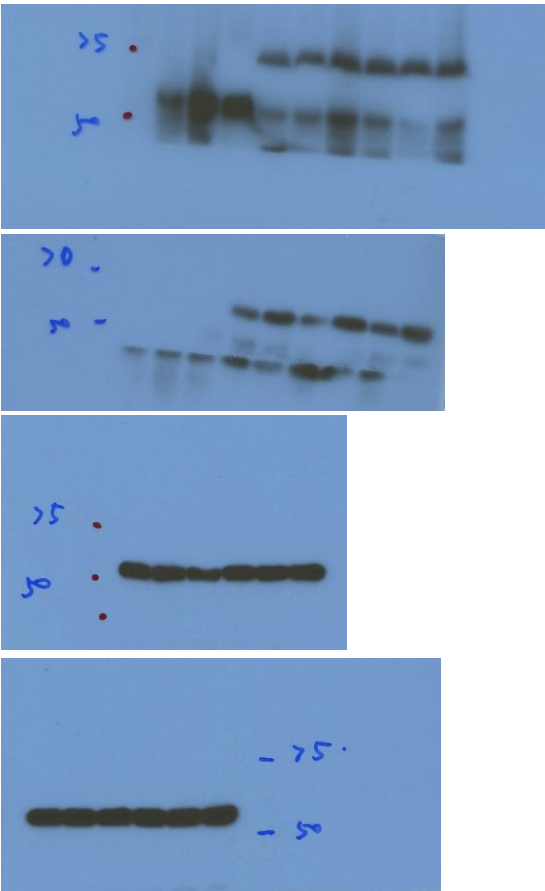

**d**

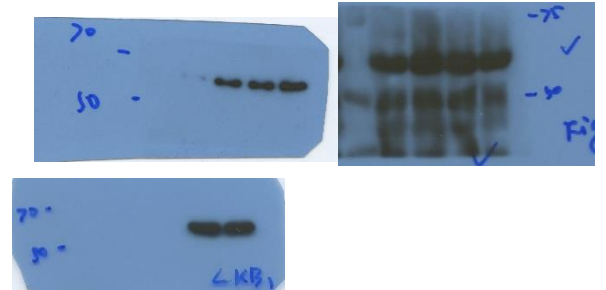

**Fig. S6**

**a**

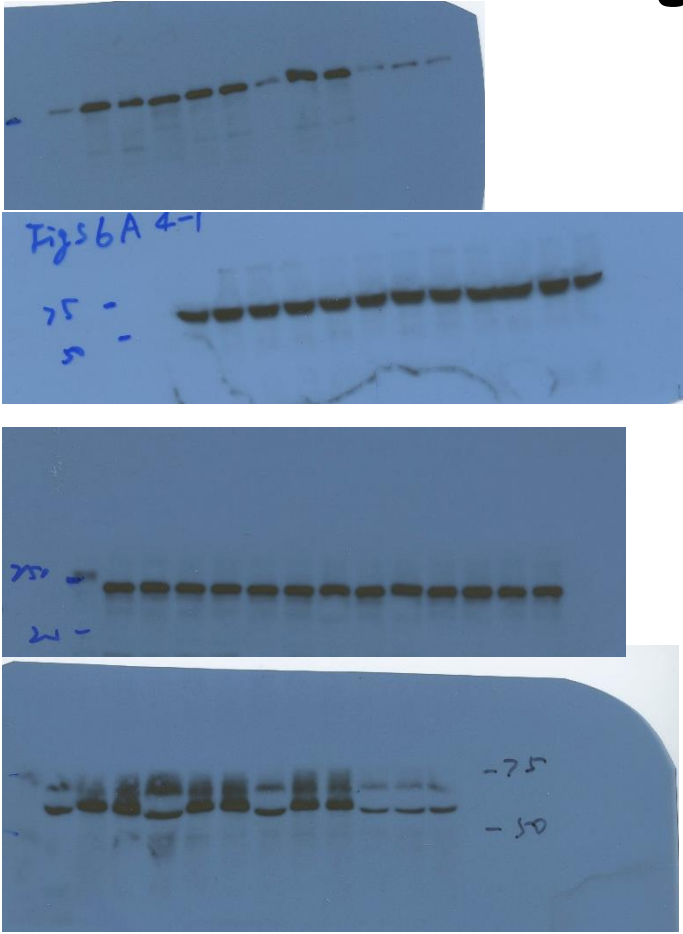

**Fig. S7**

**b**

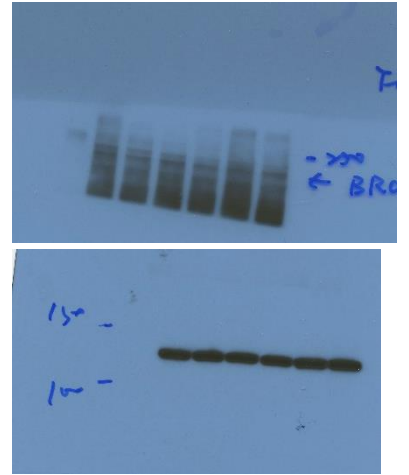

Supplement: NIHMS759423-supplement-9.pdf [file NIHMS759423-supplement-9.pdf]
