# Supplementary material
Source: PubMed Central journal article supplement (PMC4814347)

**Fig.S1**

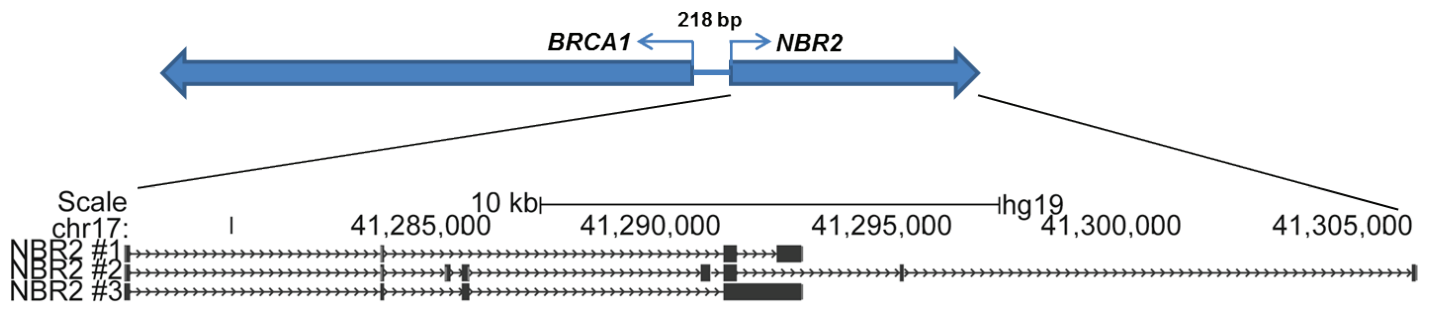

Supplement: NIHMS759423-supplement-2.pdf [file NIHMS759423-supplement-2.pdf]

**Fig. S2**

**a**

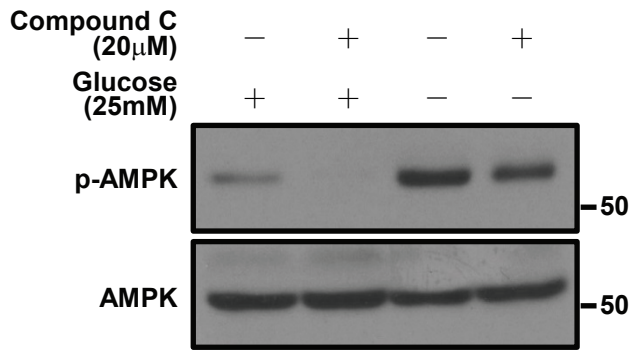

**b**

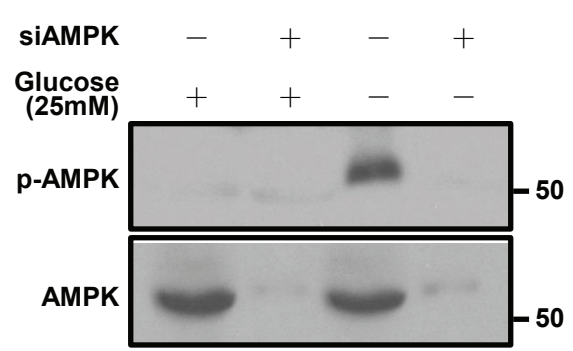

Supplement: NIHMS759423-supplement-3.pdf [file NIHMS759423-supplement-3.pdf]

**Fig. S3**

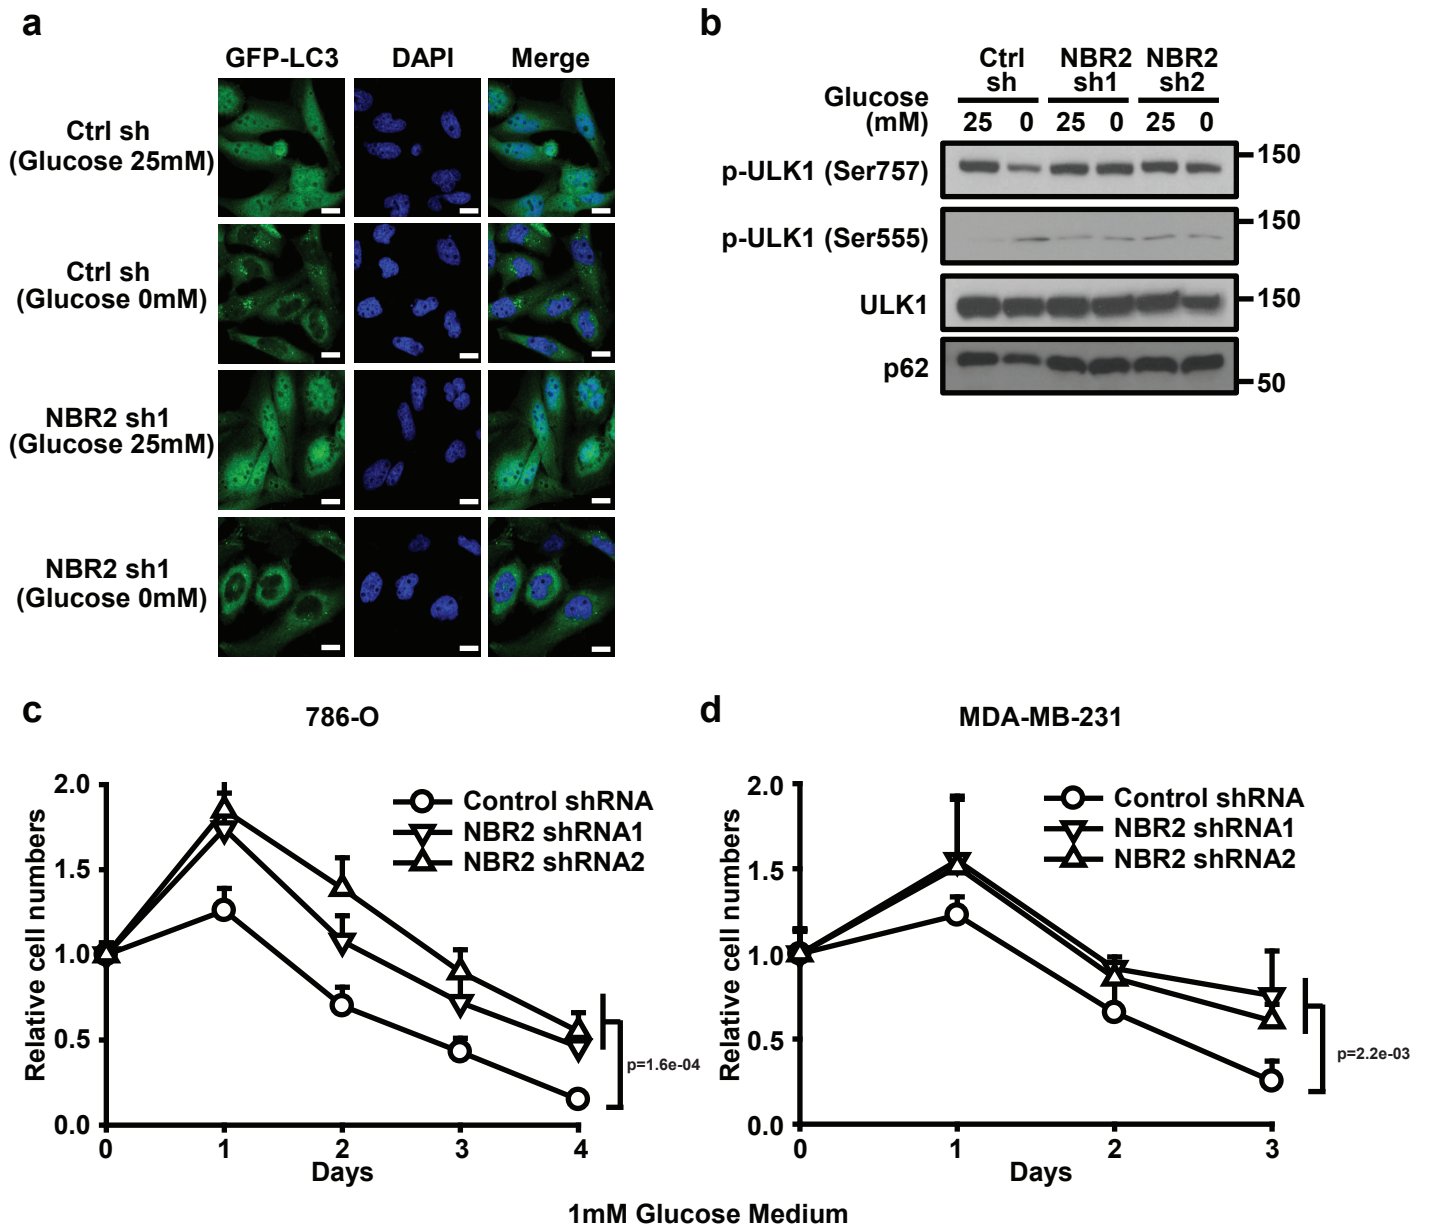

Supplement: NIHMS759423-supplement-4.pdf [file NIHMS759423-supplement-4.pdf]

**Fig. S4**

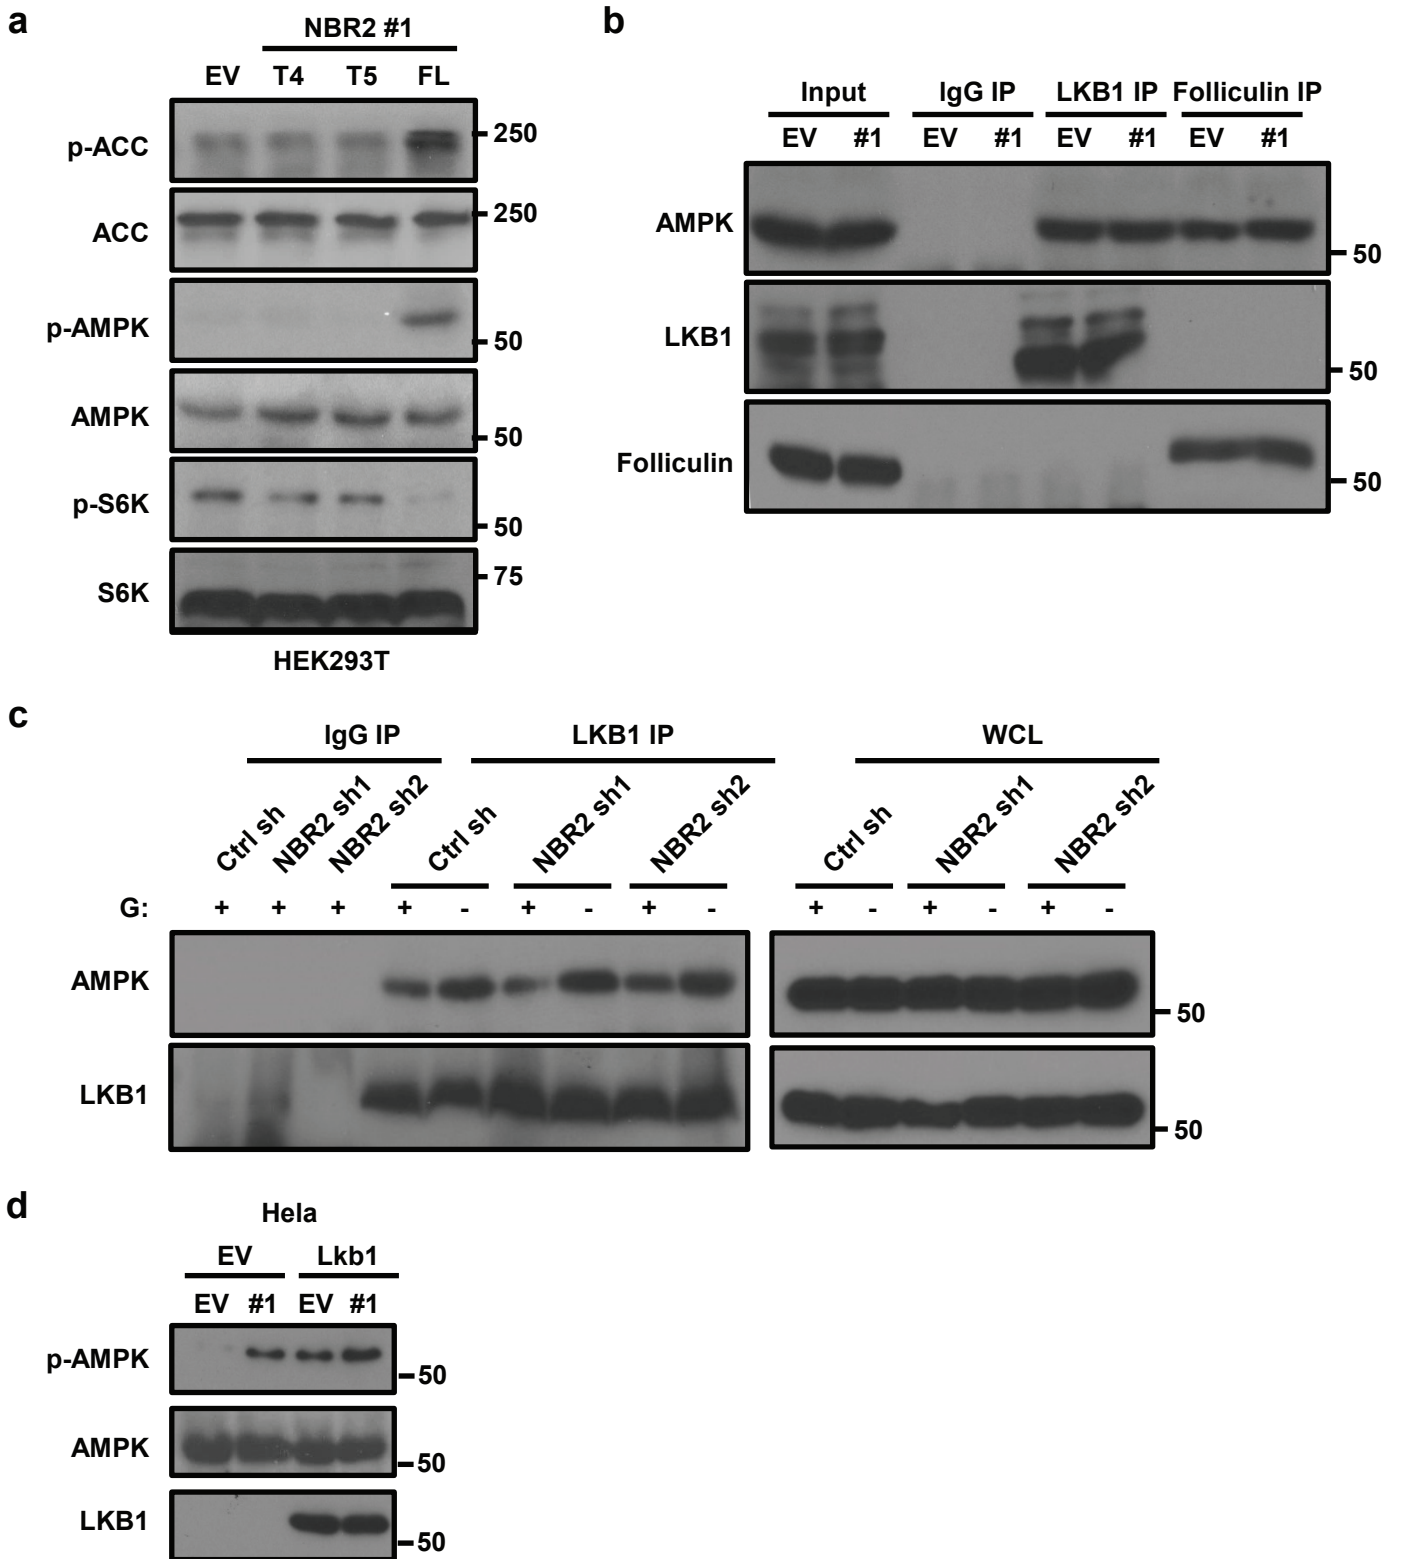

Supplement: NIHMS759423-supplement-5.pdf [file NIHMS759423-supplement-5.pdf]

Fig. S5

a

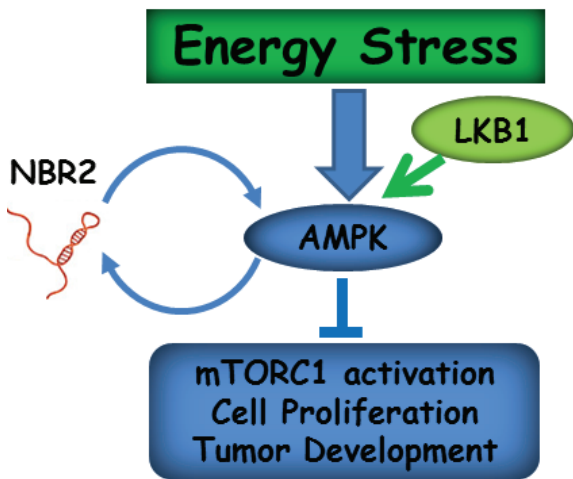

b

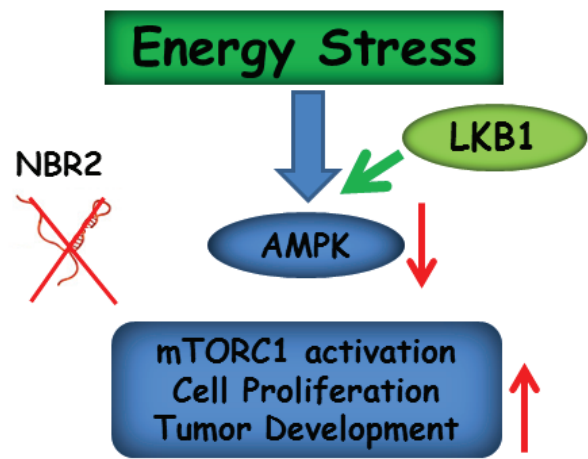

Supplement: NIHMS759423-supplement-6.pdf [file NIHMS759423-supplement-6.pdf]

**Fig. S6**

**a**

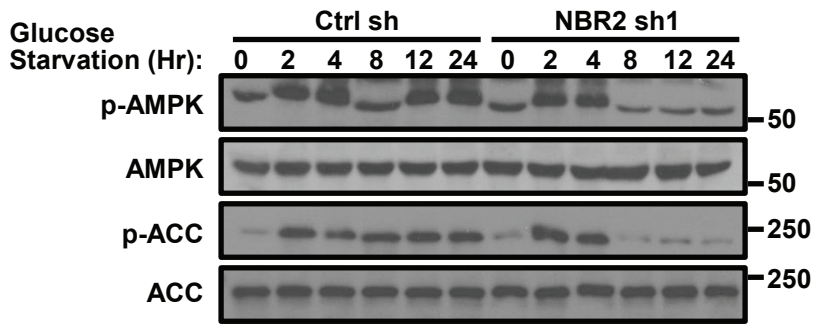

**b**

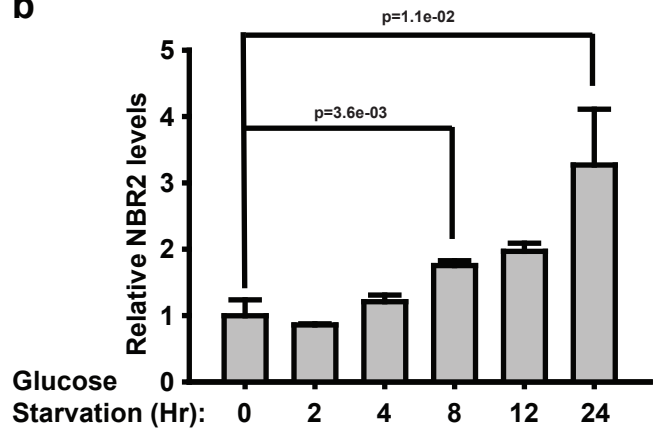

Supplement: NIHMS759423-supplement-7.pdf [file NIHMS759423-supplement-7.pdf]
